# Supplementary material for: A wearable 3D-printed hollow microneedle device for pressure-driven interstitial fluid collection and testing
Source: Royal Society of Chemistry journal article supplement (doi:10.1039/d5lc00657k), 2026-01-01
Supplement: d5lc00657k1.pdf [file d5lc00657k1.pdf]

**Supplementary Information**

**A Wearable 3D-Printed Hollow Microneedle Device for Pressure-Driven Interstitial Fluid Collection and Testing**

Nedim Hacısmanoğlu<sup>1,2</sup>, Emre Ece<sup>1,2</sup>, Fatih Inci<sup>1,2#</sup>

<sup>1</sup> UNAM-National Nanotechnology Research Center, Bilkent University, 06800, Ankara, Turkey

<sup>2</sup> Institute of Materials Science and Nanotechnology, Bilkent University, 06800, Ankara, Turkey

# Corresponding author: [finci@bilkent.edu.tr](mailto:finci@bilkent.edu.tr)

ORCID ID: 0000-0002-9918-5038

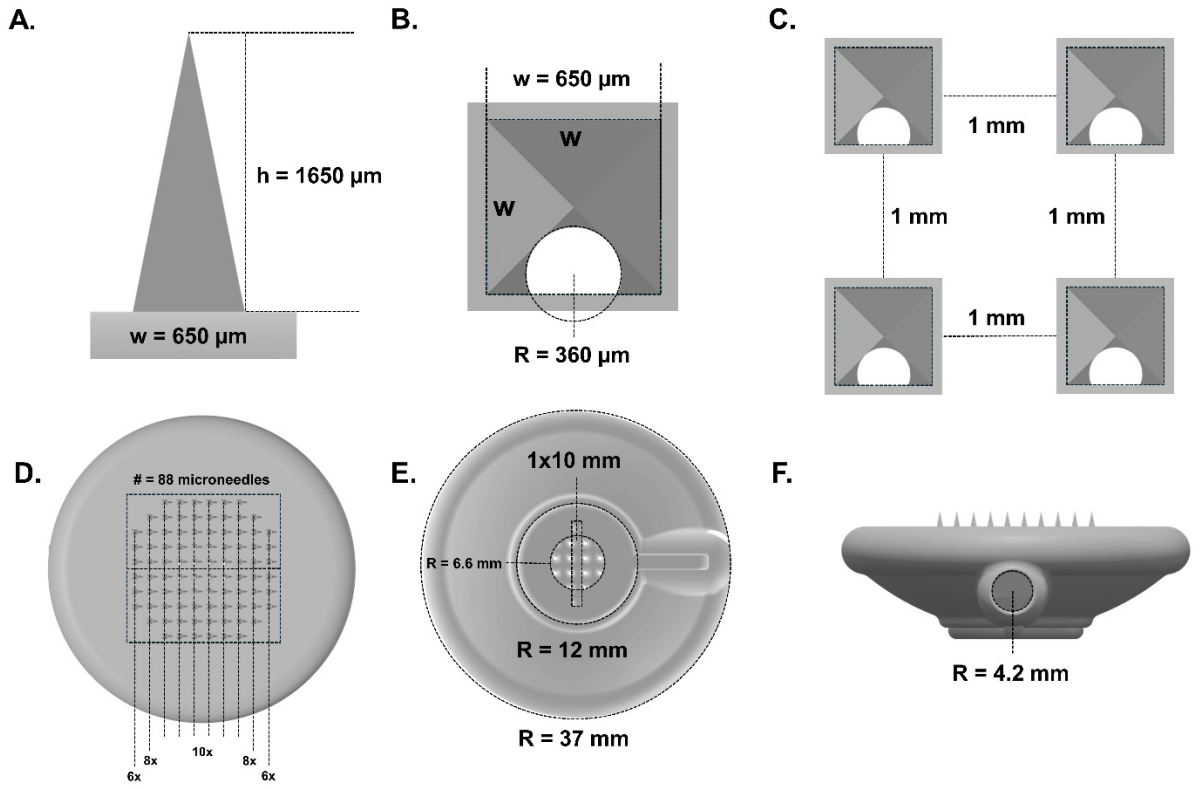

**Fig. S1**  $\mu$ HolloSense design and dimensions, (A) MN design (side), (B) MN and bore design (top), (C) Multiple MN separation, (D) MN orientation (top), (E) Buffer and LFA port dimensions, and (F) Syringe port orientation.

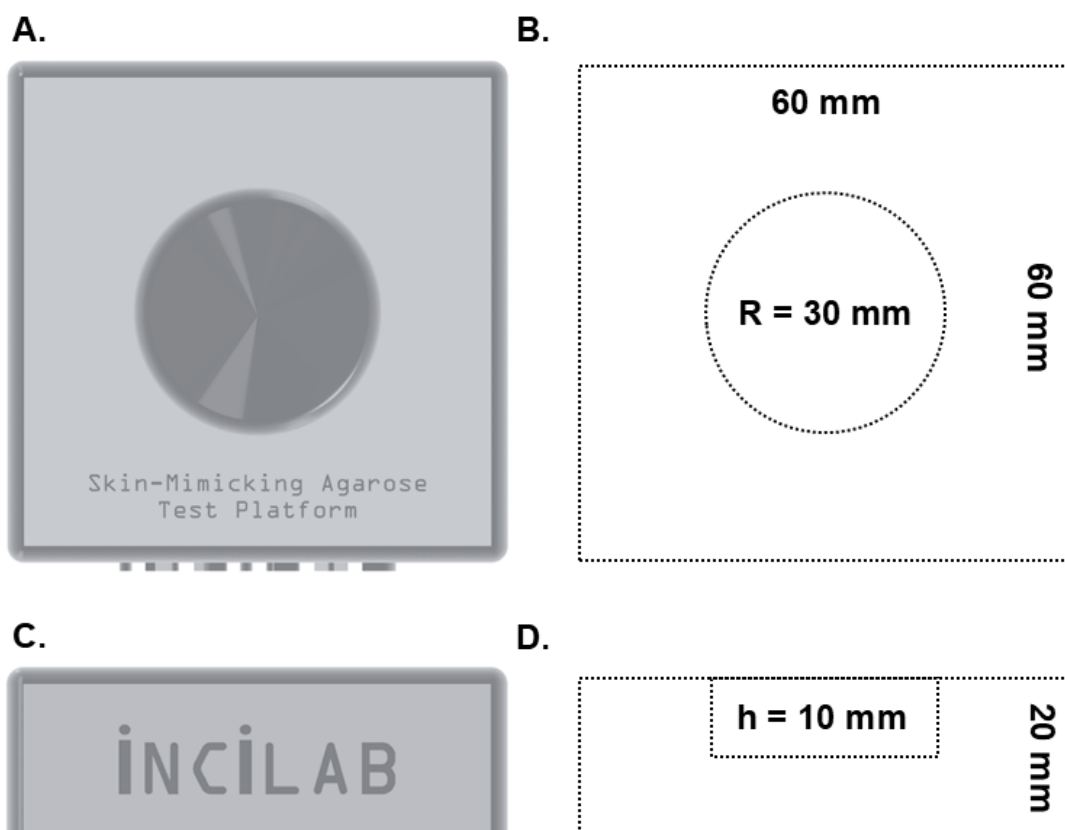

**Fig. S2** Dimensions of skin-mimicking agarose test platform, (A) 3D design (top), (B) Dimensions (top), (C) 3D design (side), and (D) Dimensions (side).

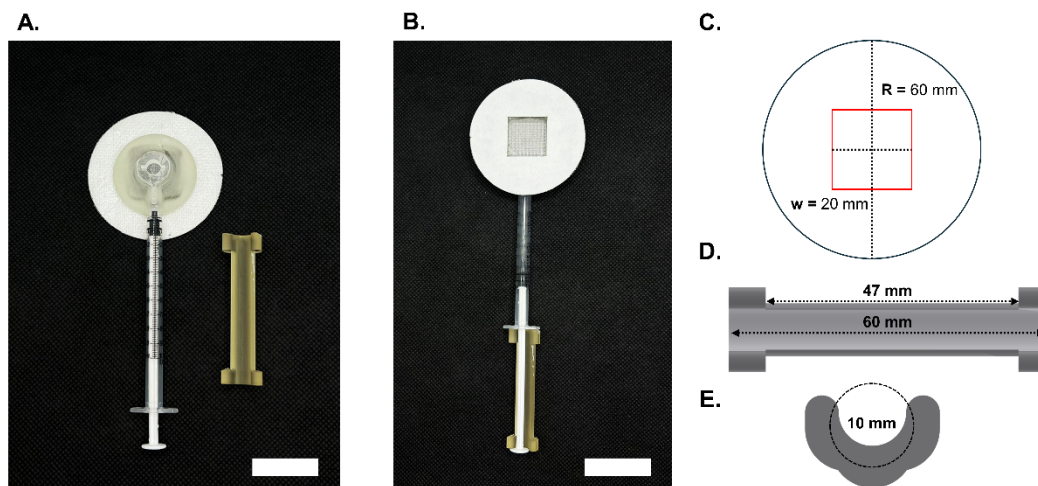

**Fig. S3** Assembled  $\mu$ HolloSense and accessory parts, (A) device without stopper (back), (B) device with stopper (front), (C) dimensions for bandage cutting, (D) stopper dimensions (front), and (E) device dimensions (top). All scale bars represent 1 cm.

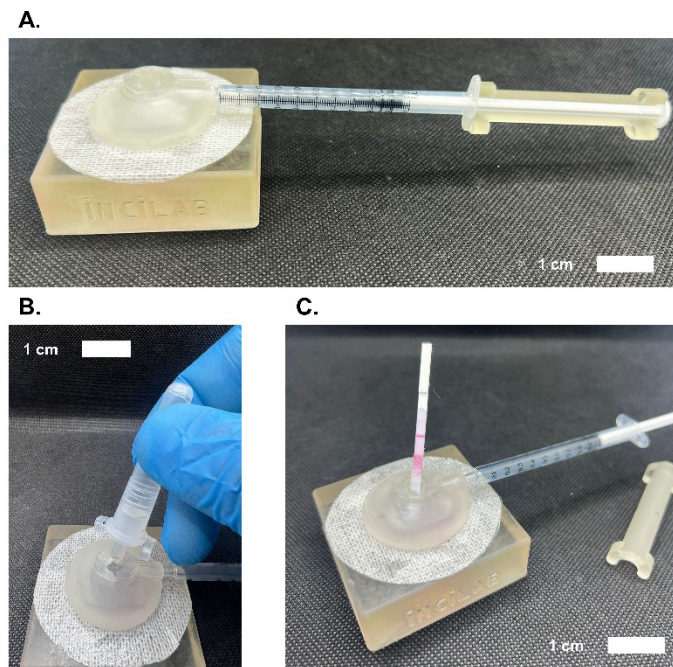

**Fig. S4.** Operation of  $\mu$ HolloSense and model antigen test, (A) device in suction mode, (B) buffer addition from the buffer port, and (C) LFA strip insertion.

**Table S1:** Cost /Component analysis for bench scale production of a single  $\mu$ HolloSense excluding overhead costs.

| <b>Component</b>                                                                            | <b>Cost</b>       |
|---------------------------------------------------------------------------------------------|-------------------|
| <b>Resin</b> ( <i>11.2 g – 10.2 mL, 1 <math>\mu</math>HolloSense and 1 stopper as set</i> ) | \$0.34 per set    |
| <b>Printing and Curing Cost</b> ( <i>Electricity and device cost</i> )                      | \$0.10 per set    |
| <b>Post Processing</b> ( <i>Isopropil alcohol, gloves, etc.</i> )                           | \$0.05 per set    |
| <b>Consumables</b> ( <i>Wipes, tissues, etc.</i> )                                          | \$0.06 per set    |
| <b>Labor</b> ( <i>\$6/h, 15 device per batch</i> )                                          | \$0.25 per set    |
| <b>Medical Tape</b>                                                                         | \$0.10 per device |
| <b>Syringe</b>                                                                              | \$0.10 per device |
| <b><i>Total (single device): \$1</i></b>                                                    |                   |

**Table S2:** Comparison of the recent studies and our platform.

| Reference                         | Pressure Mechanism     | Estimated Cost | Extracted Volume       | Time          | Production Method                                           | Pros and Cons                                                                                                                                                                                                        |
|-----------------------------------|------------------------|----------------|------------------------|---------------|-------------------------------------------------------------|----------------------------------------------------------------------------------------------------------------------------------------------------------------------------------------------------------------------|
| Jiang et al. (2024) [1]           | -50 kPa (Hand pump)    | High           | 20.8 $\mu\text{L}$     | 25 min        | Stainless steel MN + rigid patch + hand pump                | <p>PROS: High volume collected, over 100 puncture sites</p> <p>CONS: Lengthy extraction time (25 min), requires external hand pump, complex assembly</p>                                                             |
| Ribet et al. (2023) [2]           | Positive (Compression) | Medium-High    | 1.1 $\mu\text{L}$      | ~3 min        | Single Stainless Steel MN + Microfluidic paper chip         | <p>PROS: Precise volume metering (0.1-1 <math>\mu\text{L}</math>), dry storage capable</p> <p>CONS: Single needle only, very small extraction volume (1.1 <math>\mu\text{L}</math>), stainless steel fabrication</p> |
| Xie et al. (2024) [3]             | 75 Pa (Vacuum tube)    | Medium-High    | 18.4 $\mu\text{L}$     | 5 min         | 3D-printed MN (10 $\times$ 10) + vacuum tube system         | <p>PROS: Rapid extraction (5 min), very low pressure (75 Pa), integrated sensing papers</p> <p>CONS: Requires vacuum tube system</p>                                                                                 |
| Miller et al. (2018) [4]          | Positive (Compression) | High           | Up to 16 $\mu\text{L}$ | Several hours | Stainless Steel MN + Concentric holder + compression system | <p>PROS: High volume extraction (up to 16 <math>\mu\text{L}</math>)</p> <p>CONS: Lengthy assay time (hours), complex holder design</p>                                                                               |
| Samant and Prausnitz (2020) [5]   | -50 kPa (Vacuum)       | High           | 1–6 $\mu\text{L}$      | 20 min        | Solid metal MN array + vacuum system                        | <p>PROS: Clinically tested</p> <p>CONS: Requires multiple insertions, solid metal fabrication, external vacuum</p>                                                                                                   |
| Wang et al. (2021) [6]            | Vacuum pressure        | High           | 1–10 $\mu\text{L}$     | 2–10 min      | Solid glass MN (700-1500 $\mu\text{m}$ ) + vacuum           | <p>PROS: Ultrasensitive protein quantification down to pg/mL levels</p> <p>CONS: Glass microfabrication, requires a vacuum equipment</p>                                                                             |
| Wilkirson and Lillehoj (2024) [7] | Vacuum-assisted        | Medium         | Not specified          | <20 min       | MN array + Patch LFA                                        | <p>PROS: Direct on-patch testing</p> <p>CONS: Volume not quantified, multi-step fabrication, external vacuum</p>                                                                                                     |
| Sharkey et al. (2025) [8]         | Osmotic Pump           | Low-Medium     | Not quantified         | 15–45 min     | Hydrogel MN + Paper microfluidics + osmotic pump            | <p>PROS: Zero-power passive extraction</p> <p>CONS: Slow extraction (up to 45 min)</p>                                                                                                                               |

|                                   |                                         |             |                           |                 |                                                                      |                                                                                                                                                                                                                                                |
|-----------------------------------|-----------------------------------------|-------------|---------------------------|-----------------|----------------------------------------------------------------------|------------------------------------------------------------------------------------------------------------------------------------------------------------------------------------------------------------------------------------------------|
| Guentner et al. (2025) [9]        | 50 kPa (Positive pressure ring)         | Medium-High | ~15.5 $\mu$ L             | 5 min           | 3D-printed polymer HMN (Two-photon polymerization) + pressure device | <p>PROS: Near-zero failure rate, optimized pressure gradient (10 kPa increment), high precision printing, rapid extraction</p> <p>CONS: Requires specialized two-photon equipment, complex fabrication, an external pressure device needed</p> |
| Abbasiasl et al. (2025) [10]      | Capillary flow + passive hydrophilicity | Medium      | Not specified             | Several minutes | High-precision projection 3D printing + coating                      | <p>PROS: Continuous ISF sampling, integrated biomarker detection on-patch down to mM level, polymeric biocompatible MNs</p> <p>CONS: Requires advanced 3D printing and thin oxide coating fabrication</p>                                      |
| <b><math>\mu</math>HolloSense</b> | <b>Negative (Syringe vacuum)</b>        | <b>Low</b>  | <b>Sufficient for LFA</b> | <b>5-20 min</b> | <b>One-step SLA 3D Printing</b>                                      | <p><b>PROS: Low cost (\$1), integrated LFA port, one-step fabrication, all-in-one wearable</b></p> <p><b>CONS: In vitro validation only</b></p>                                                                                                |



## REFERENCES

- [1] X. Jiang, E. C. Wilkerson, A. O. Bailey, W. K. Russell, and P. B. Lillehoj, “Microneedle-based sampling of dermal interstitial fluid using a vacuum-assisted skin patch,” *Cell Reports. Phys. Sci.*, vol. 5, no. 6, p. 101975, Jun. 2024.
- [2] F. Ribet, A. Bendes, C. Fredolini, M. Dobielewski, M. Böttcher, O. Beck, J. M. Schwenk, G. Stemme, and N. Roxhed, “Microneedle Patch for Painless Intradermal Collection of Interstitial Fluid Enabling Multianalyte Measurement of Small Molecules, SARS-CoV-2 Antibodies, and Protein Profiling,” *Adv. Healthc. Mater.*, vol. 12, no. 13, May 2023.
- [3] Y. Xie, J. He, W. He, T. Iftikhar, C. Zhang, L. Su, and X. Zhang, “Enhanced Interstitial Fluid Extraction and Rapid Analysis via Vacuum Tube-Integrated Microneedle Array Device,” *Adv. Sci.*, vol. 11, no. 21, p. 2308716, 2024.
- [4] P. R. Miller, R. M. Taylor, B. Q. Tran, G. Boyd, T. Glaros, V. H. Chavez, R. Krishnakumar, A. Sinha, K. Poorey, K. P. Williams, S. S. Branda, J. T. Baca, and R. Polsky, “Extraction and Biomolecular Analysis of Dermal Interstitial Fluid Collected with Hollow Microneedles,” *Commun. Biol.*, vol. 1, p. 173, 2018.
- [5] P. P. Samant, M. M. Niedzwiecki, N. Raviele, V. Tran, J. Mena-Lapaix, D. I. Walker, E. I. Felner, D. P. Jones, G. W. Miller, and M. R. Prausnitz, “Sampling interstitial fluid from human skin using a microneedle patch,” *Sci. Transl. Med.*, vol. 12, no. 571, p. eaaw0285, Nov. 2020.
- [6] Z. Wang, J. Luan, A. Seth, L. Liu, M. You, P. Gupta, P. Rathi, Y. Wang, S. Cao, Q. Jiang, X. Zhang, R. Gupta, Q. Zhou, J. J. Morrissey, E. L. Scheller, J. S. Rudra, and S. Singamaneni, “Microneedle patch for the ultrasensitive quantification of protein biomarkers in interstitial fluid,” *Nat. Biomed. Eng. 2021 51*, vol. 5, no. 1, pp. 64–76, Jan. 2021.
- [7] E. C. Wilkerson, D. Li, and P. B. Lillehoj, “Lateral Flow-Based Skin Patch for Rapid Detection of Protein Biomarkers in Human Dermal Interstitial Fluid,” *ACS Sensors*, Nov. 2024.
- [8] C. T. Sharkey, A. F. Aroche, I. G. Agusta, H. Nissan, T. Saha, S. Mukherjee, J. S. Twiddy, M. D. Dickey, O. Velev, and M. A. Daniele, “Design and Characterization of a Self-Powered Microneedle Microfluidic System for Interstitial Fluid Sampling,” *Lab Chip*, vol. 25, pp. 4577–4587, 2025.
- [9] A. Guentner, J. Barreiros, Y. Temiz, P. Glatzel, N. Shamsudhin, N. Bellini, M. Zenobi-Wong, and E. Delamarche, “3D-Printed Polymer Hollow Microneedles on Microfluidic Platforms for

Minimally Invasive Interstitial Fluid Extraction,” *Adv. Mater. Technol.*, 2025.

- [10] T. Abbasiasl, S. Sarıca, U. C. Yener, E. Yilgor, I. Yilgor, H. Ceylan Koydemir, E. Öztürk, and L. Beker, “A Hydrophilic Hollow Microneedle Platform for Sampling Interstitial Fluid and On-Site Biomarker Detection,” *Adv. Mater. Technol.*, vol. 10, no. 22, 2025.
